# Supplementary material for: Board certification and urban–rural migration of physicians in Japan
Source: Springer Nature journal article supplement (doi:10.1186/s12913-018-3441-y), 2018-08-07

### Odds of migrating to more urban areas for newly certified physicians working in first tertile areas in 2012 (sub-analysis)

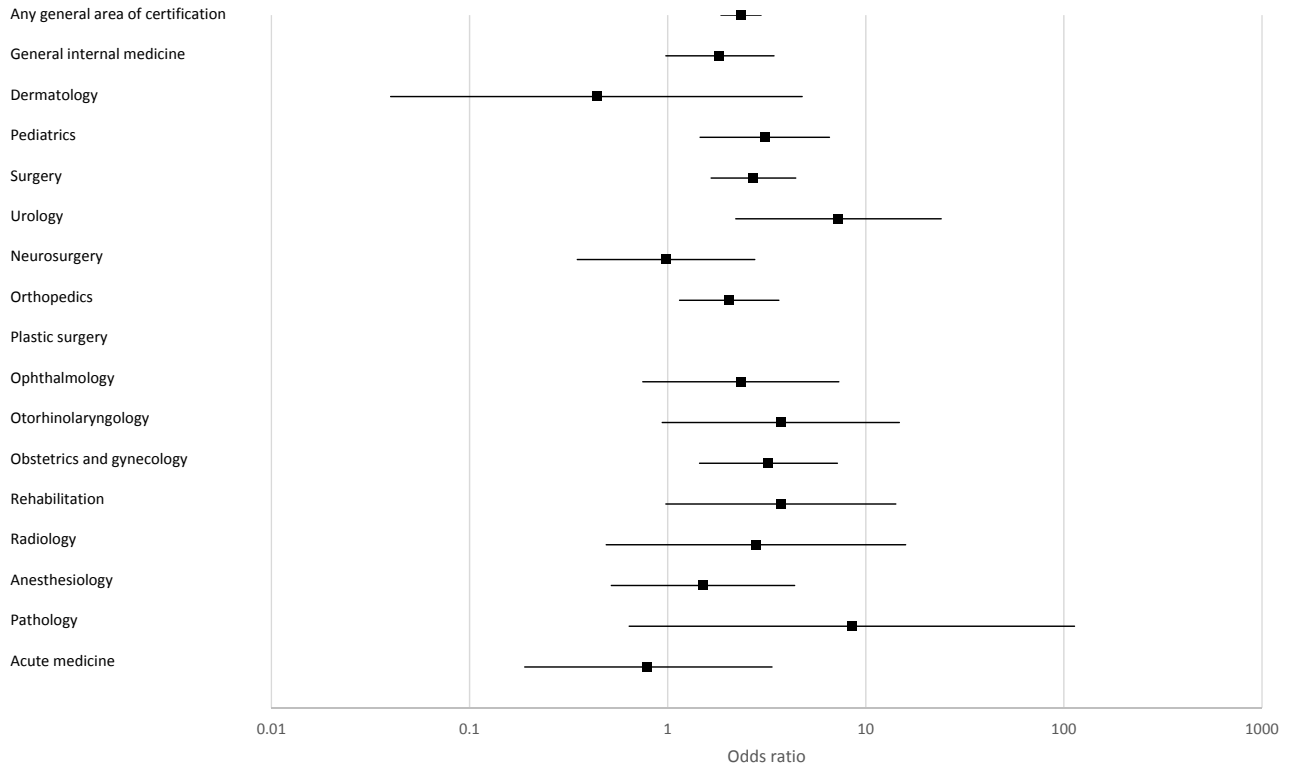

### Odds of migrating to more urban areas for newly certified physicians working in second tertile areas in 2012 (sub-analysis)

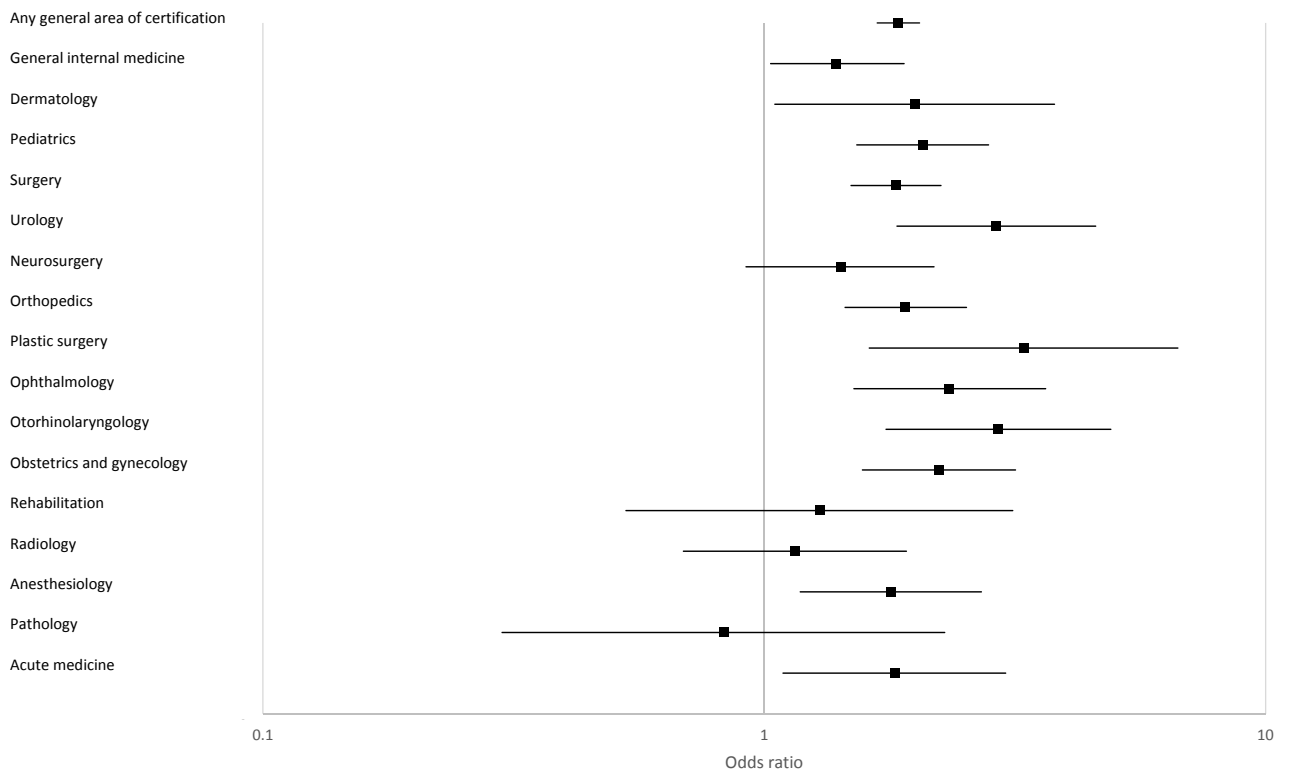

Supplement: MOESM1 [file 16017396]
