# Supplementary material for: Board certification and urban–rural migration of physicians in Japan
Source: Springer Nature journal article supplement (doi:10.1186/s12913-018-3441-y), 2018-08-07

## Rural practice and odds of keeping board certification (sub-analysis)

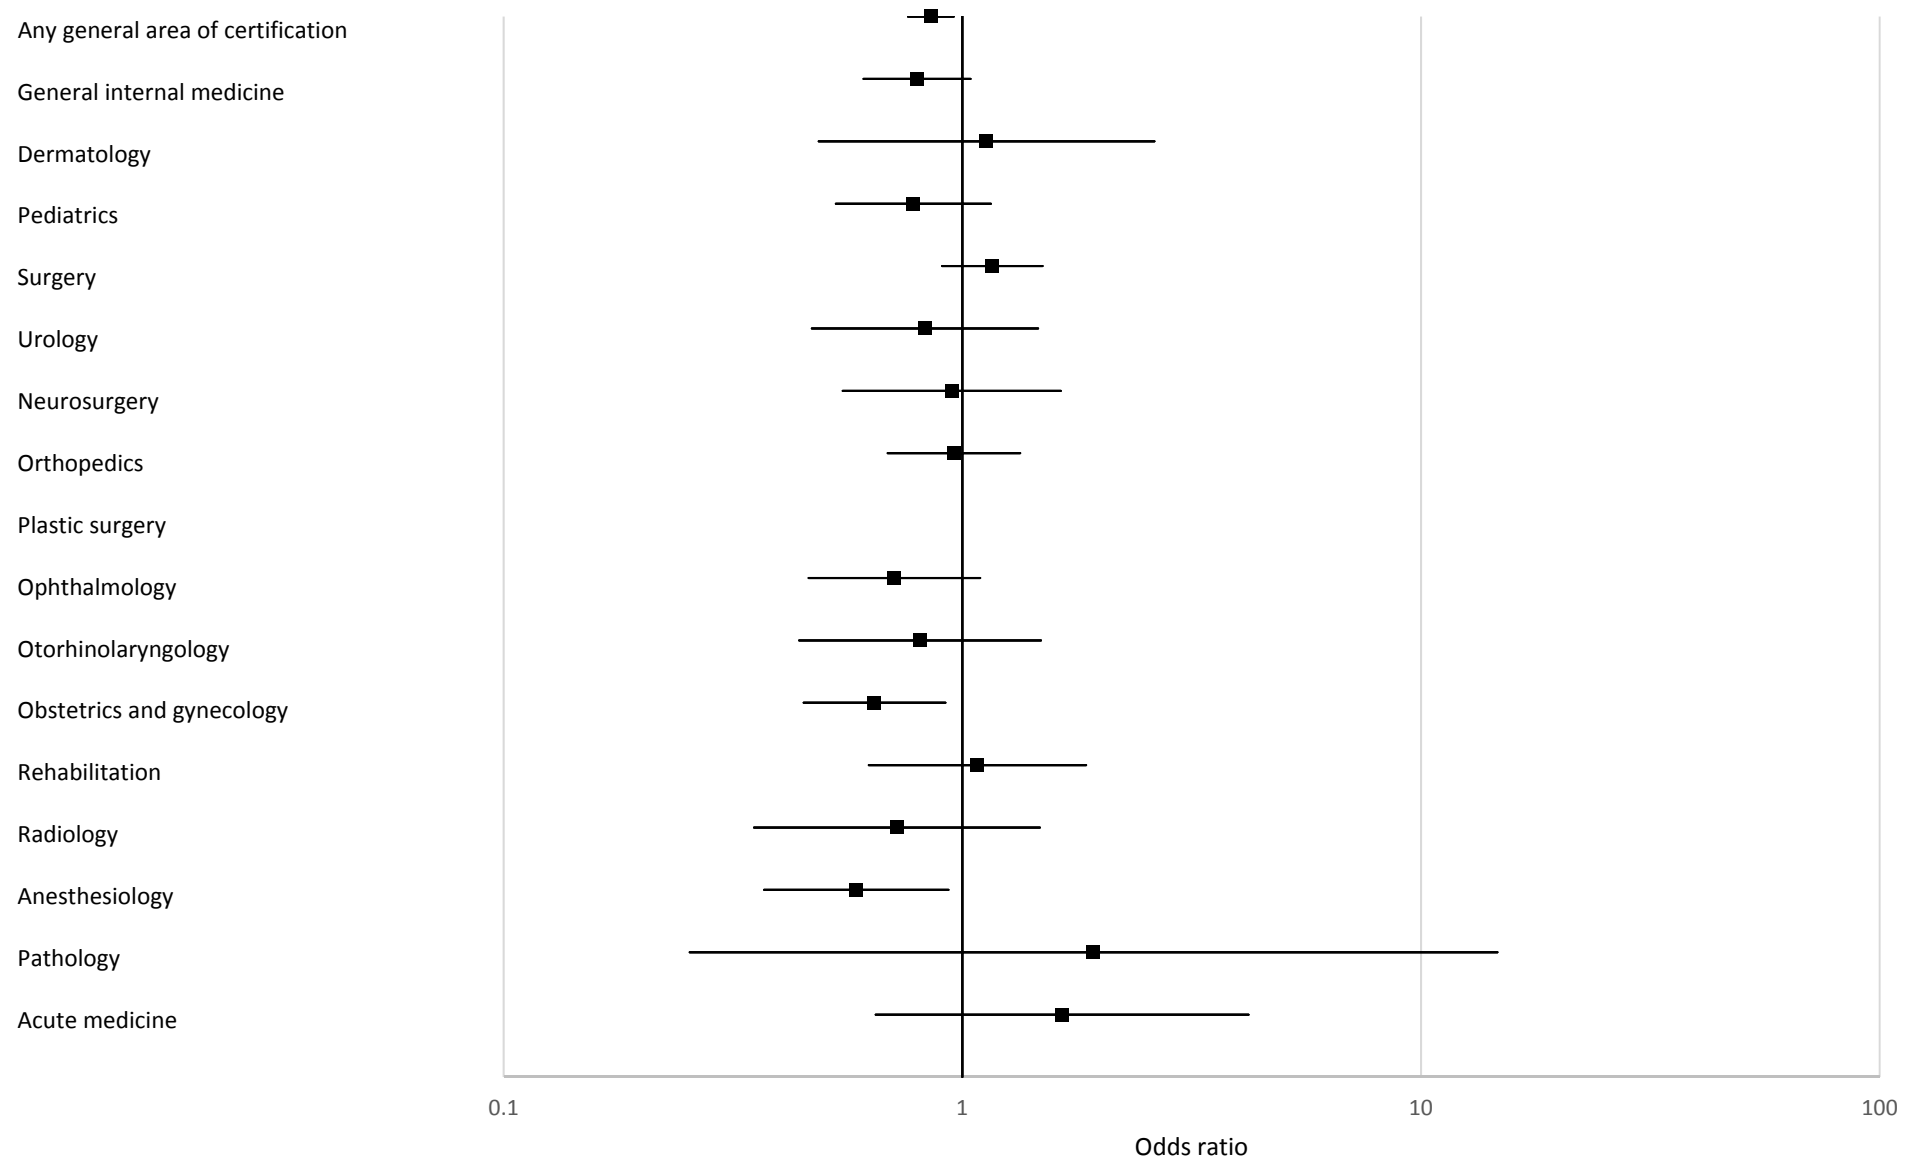

Supplement: MOESM3 [file 16017396]
